# Supplementary material for: New insights into family relationships within the avian superfamily Sylvioidea (Passeriformes) based on seven molecular markers
Source: PubMed Central journal article supplement (PMC3462691; doi:10.1186/1471-2148-12-157), 2012-08-25
Supplement: 1471-2148-12-157-S1.pdf [file 1471-2148-12-157-S1.pdf]

## GenBank No.

| Species                              | Locality             | Sample numbers for new samples | GenBank No.     |          |                 |                 |                 |                 |                 |
|--------------------------------------|----------------------|--------------------------------|-----------------|----------|-----------------|-----------------|-----------------|-----------------|-----------------|
|                                      |                      |                                | MT-CYB          | FGB      | GAPDH           | LDHB            | MB              | ODC1            | RAG1            |
| <b>Ingroup</b>                       |                      |                                |                 |          |                 |                 |                 |                 |                 |
| <i>Abroscopus albogularis</i>        | China, Sichuan       | DZUG:U1932                     | HQ706175        | –        | HQ706264        | HQ706186        | HQ706226        | HQ706303        | <b>JX236411</b> |
| <i>Acrocephalus dumetorum</i>        | Russia, Yennessei    |                                | –               | –        | –               | –               | FJ883105        | FJ883134        | –               |
|                                      | Kazakhstan           |                                | –               | –        | –               | FJ883062        | –               | –               | –               |
|                                      | India, Punjab        |                                | –               | EF626749 | FJ357911        | –               | –               | –               | FJ358146        |
|                                      | Finland              |                                | AJ004773        | –        | –               | –               | –               | –               | –               |
| <i>Acrocephalus gracilirostris</i>   | Kenya                | VH:B0529                       | AJ004782        | –        | –               | FJ883063        | FJ883095        | FJ883135        | <b>JX236412</b> |
| <i>Aegithalos caudatus</i>           | Germany              | VH:A1553 (B0668)               | <b>JX236371</b> | –        | –               | <b>JX236296</b> | –               | –               | <b>JX236413</b> |
|                                      | Sweden               |                                | –               | EU680621 | FJ357912        | –               | AY228281        | EU680703        | –               |
| <i>Alauda arvensis</i>               | Sweden               |                                | <b>JX236372</b> | EF626747 | FJ357913        | HQ333047        | AY228284        | EF625336        | AY056978        |
| <i>Ammomanes deserti</i>             | Jordan               | VH:A1592 (B0703)               | <b>JX236373</b> | –        | <b>JX236286</b> | <b>JX236297</b> | <b>JX236343</b> | –               | <b>JX236414</b> |
|                                      | Saudi Arabia         | UCT #1 H. Harah 4/4/00         | –               | –        | –               | –               | –               | <b>JX236460</b> | –               |
| <i>Apalis flavida</i>                | South Africa         | VH:B0745                       | HQ333036        | –        | HQ333097        | HQ333049        | HQ333069        | HQ333083        | <b>JX236415</b> |
| <i>Arizelocichla masukuensis</i>     | Tanzania             | ZMUC:117572 (O1783)            | HQ333035        | EF626698 | –               | HQ333048        | <b>JX236344</b> | EF625287        | <b>JX236416</b> |
| <i>Artisornis metopias</i>           | Tanzania             | ZMUC:118732 (O2943)            | <b>JX236374</b> | EU686247 | –               | <b>JX236298</b> | <b>JX236345</b> | –               | <b>JX236417</b> |
|                                      | Tanzania             | DZUG:3246                      | –               | –        | <b>JX236295</b> | –               | –               | <b>JX236461</b> | –               |
| <i>Atimastillas flavicollis</i>      | Congo                |                                | –               | EF626721 | –               | –               | –               | EF625310        | –               |
|                                      | West Africa          | VH:A1575 (B0720)               | <b>JX236375</b> | –        | <b>JX236287</b> | <b>JX236299</b> | <b>JX236346</b> | –               | <b>JX236418</b> |
| <i>Bernieria madagascariensis</i>    | Madagascar           | FMNH:431202                    | HQ333038        | –        | HQ333100        | HQ333052        | HQ333071        | HQ333086        | <b>JX236419</b> |
| <i>Bradypterus baboecala</i>         | Kenya                | VH:A0769 (B0706)               | FJ883053        | –        | –               | –               | –               | FJ883162        | <b>JX236420</b> |
|                                      | South Africa         |                                | –               | –        | HQ333098        | FJ883090        | DQ008525        | –               | –               |
| <i>Calamonastes simplex</i>          | Tanzania             | ZMUC:O6645                     | <b>JX236376</b> | –        | –               | <b>JX236300</b> | <b>JX236347</b> | –               | <b>JX236422</b> |
| <i>Calamonastides gracilirostris</i> | Kenya                | VH:A0847 (B0960)               | FJ883043        | –        | –               | FJ883077        | FJ883113        | FJ883149        | <b>JX236421</b> |
| <i>Camaroptera brevicaudata</i>      | Senegal              | VH:B0735                       | –               | –        | –               | <b>JX236301</b> | –               | –               | –               |
|                                      | Rwanda               | VH:B0027                       | <b>JX236377</b> | –        | –               | –               | <b>JX236348</b> | –               | <b>JX236423</b> |
|                                      | Nigeria, Jos Plateau | DZUG 133                       | –               | –        | –               | –               | –               | <b>JX236462</b> | –               |
| <i>Camaroptera chloronota</i>        | Uganda               | ZMUC:O3270                     | <b>JX236378</b> | –        | <b>JX236288</b> | <b>JX236302</b> | <b>JX236349</b> | <b>JX236463</b> | <b>JX236424</b> |
|                                      | Uganda:Kibale        | ZMUC:119031                    | –               | –        | –               | –               | –               | –               | –               |
| <i>Cettia cetti</i>                  | Israel               | VH:A1579 (B0732)               | <b>JX236380</b> | –        | –               | HQ333053        | –               | –               | <b>JX236425</b> |
|                                      | France               |                                | –               | –        | HQ706263        | –               | HQ706225        | HQ121555        | –               |
| <i>Cettia diphone</i>                | Russia               |                                | –               | –        | HQ121536        | –               | –               | –               | –               |
|                                      | China, Shaanxi       |                                | DQ008510        | –        | –               | –               | –               | –               | –               |
|                                      | unknown              |                                | –               | EU680634 | –               | –               | EU680584        | EU680714        | –               |
| <i>Chamaea fasciata</i>              | USA, California      |                                | AJ534526        | –        | FJ357856        | <b>JX236305</b> | FJ357927        | FJ358025        | FJ358091        |

## GenBank No.

|                                |                      |                     |                 |          |                 |                 |                 |                 |                 |
|--------------------------------|----------------------|---------------------|-----------------|----------|-----------------|-----------------|-----------------|-----------------|-----------------|
| <i>Chrysomma sinense</i>       | China, Yunnan        | VH:B0690            | <b>JX236381</b> | –        | FJ357857        | <b>JX236306</b> | FJ357928        | FJ358026        | FJ358092        |
| <i>Cisticola carruthersi</i>   | Kenya                | VH:A1585 (B0736)    | <b>JX236382</b> | –        | <b>JX236289</b> | <b>JX236307</b> | <b>JX236350</b> | –               | <b>JX236426</b> |
| <i>Crossleyia xanthophrys</i>  | Madagascar           | FMNH:393280         | HQ706177        | –        | HQ706269        | HQ706191        | HQ706231        | HQ706309        | <b>JX236427</b> |
| <i>Cryptillas victorini</i>    | unknown              |                     | AY958231        | EU680630 | –               | –               | EU680602        | EU680710        | AY799815        |
| <i>Delichon urbicum</i>        | Spain                |                     | DQ008517        | –        | HQ333103        | HQ333055        | DQ008568        | –               | –               |
|                                | unknown              |                     | –               | EU680641 | –               | –               | –               | EU680721        | –               |
| <i>Donacobius atricapillus</i> | Paraguay             |                     | DQ008481        | EU680643 | FJ357915        | HQ333054        | DQ008533        | EU680723        | –               |
|                                | unknown              |                     | –               | –        | –               | –               | –               | –               | AY319979        |
| <i>Dromaeocercus brunneus</i>  | Madagascar           | FMNH:384749         | HQ706160        | EU680644 | HQ706289        | HQ706211        | <b>JX236351</b> | EU680724        | <b>JX236428</b> |
| <i>Dumetia hyperythra</i>      | India, Mysore        | VH:A0908 (B0741)    | <b>JX236383</b> | –        | FJ357859        | <b>JX236309</b> | FJ357930        | FJ358028        | FJ358094        |
| <i>Eremomela gregalis</i>      | South Africa         | VH:B0744            | <b>JX236384</b> | –        | –               | <b>JX236310</b> | <b>JX236352</b> | –               | <b>JX236429</b> |
|                                | unknown              |                     | –               | EU680646 | –               | –               | –               | EU680726        | –               |
| <i>Eremomela pusilla</i>       | Ivory coast          | VH:A0766 (B0712)    | –               | –        | –               | <b>JX236311</b> | –               | –               | –               |
|                                | Jos Plateau, Nigeria | DZUG:2825           | <b>JX236385</b> | –        | <b>JX236293</b> | –               | <b>JX236353</b> | <b>JX236464</b> | –               |
| <i>Erythrocerus mcallii</i>    | Africa               |                     | AF096465        | EU680647 | HQ121544        | –               | EU680585        | EU680727        | –               |
| <i>Hartertula flavoviridis</i> | Madagascar           | FMNH:438721         | HQ706131        | EU680650 | HQ706267        | HQ706189        | HQ706229        | HQ706307        | <b>JX236430</b> |
| <i>Hippolais icterina</i>      | Sweden               |                     | DQ008479        | –        | HQ333104        | –               | –               | –               | –               |
|                                | Ukraine, Crimea      | VH:B0981            | –               | –        | –               | FJ883078        | FJ883120        | FJ883153        | <b>JX236431</b> |
|                                | unknown              |                     | –               | EU680651 | –               | –               | –               | –               | –               |
| <i>Hirundo rustica</i>         | Germany              | VH:A1574 (B0751)    | <b>JX236387</b> | –        | HQ333105        | HQ333056        | –               | –               | –               |
|                                | Sweden               |                     | –               | EF626748 | –               | –               | AY064258        | EF441240        | –               |
|                                | unknown              |                     | –               | –        | –               | –               | –               | –               | AY443290        |
| <i>Hylia prasina</i>           | Uganda               |                     | HQ333041        | –        | –               | HQ333057        | EU680583        | EU680732        | –               |
|                                | Africa               |                     | –               | EU680652 | HQ121545        | –               | –               | –               | –               |
|                                | unknown              |                     | –               | –        | –               | –               | –               | –               | AY319984        |
| <i>Hypergerus atriceps</i>     | Guinea               | VH:A0865 (B0752)    | <b>JX236388</b> | –        | –               | <b>JX236313</b> | <b>JX236355</b> | –               | <b>JX236432</b> |
|                                | Nigeria, Jos Plateau | DZUG:2824           | –               | –        | –               | –               | –               | <b>JX236465</b> | –               |
| <i>Hypsipetes philippinus</i>  | Philippines          | ZMUC:117589 (O1800) | <b>JX236389</b> | EF626742 | –               | <b>JX236314</b> | <b>JX236356</b> | EF625331        | <b>JX236433</b> |
| <i>Illadopsis puvelli</i>      | Guinea               | VH:A0762 (B0612)    | <b>JX236390</b> | –        | –               | <b>JX236315</b> | <b>JX236357</b> | –               | <b>JX236434</b> |
|                                | unknown              |                     | –               | EU686236 | –               | –               | –               | –               | –               |
| <i>Leptopoecile sophiae</i>    | Nepal                | VH:B0762            | <b>JX236391</b> | –        | –               | <b>JX236316</b> | –               | –               | <b>JX236435</b> |
|                                | China, Qinghai       |                     | –               | EU680658 | HQ706262        | –               | DQ008569        | EU680738        | –               |
| <i>Lioparus chrysotis</i>      | unknown              | VH:A1576 (B0692)    | <b>JX236393</b> | –        | –               | <b>JX236318</b> | <b>JX236359</b> | –               | <b>JX236437</b> |
|                                | Vietnam              |                     | –               | –        | FJ357874        | –               | –               | FJ358043        | –               |
| <i>Locustella lanceolata</i>   | China, Hebei         |                     | HQ706139        | –        | HQ706275        | –               | HQ706235        | HQ706313        | –               |
|                                | China, Beidaihe      | VH:A1101 (B0761)    | –               | –        | –               | <b>JX236319</b> | –               | –               | <b>JX236438</b> |
| <i>Locustella naevia</i>       | Sweden               |                     | HQ706147        | –        | HQ706282        | –               | HQ706242        | HQ706320        | EF568259        |
|                                | Germany              |                     | –               | –        | –               | <b>JX236320</b> | –               | –               | –               |

## GenBank No.

|                                      |                         |                  |                 |          |                 |                 |                 |                 |                 |
|--------------------------------------|-------------------------|------------------|-----------------|----------|-----------------|-----------------|-----------------|-----------------|-----------------|
| <i>Macrosphenus flavicans</i>        | Congo                   |                  | –               | EF626751 | –               | –               | EF625286        | EF625340        | –               |
|                                      | unknown                 |                  | –               | –        | –               | –               | –               | –               | AY319987        |
| <i>Megalurus palustris</i>           | Philippines             | ZMUC:02031       | FJ883052        | –        | <b>JX236290</b> | FJ883089        | –               | FJ883161        | <b>JX236439</b> |
|                                      | India, Punjab           |                  | –               | EU680661 | –               | –               | DQ008529        | –               | –               |
| <i>Melocichla mentalis</i>           | Nigeria                 |                  | DQ008500        | –        | HQ333107        | –               | DQ008551        | HQ333090        | –               |
|                                      | Ivory Coast             |                  | –               | –        | –               | HQ333059        | –               | –               | –               |
|                                      | Guinea                  | VH:A0866 (B0853) | –               | –        | –               | –               | –               | –               | <b>JX236440</b> |
| <i>Mirafra javanica</i>              | Thailand                |                  | DQ008520        | –        | HQ333106        | HQ333058        | DQ008571        | HQ333089        | –               |
|                                      |                         | NRM:20046819     | –               | –        | –               | –               | –               | –               | <b>JX236441</b> |
| <i>Nesillas typica</i>               | unknown                 |                  | –               | EU680665 | –               | –               | EU680592        | EU680744        | –               |
| <i>Nicator chloris</i>               | West Africa             | VH:A1439         | –               | –        | –               | <b>JX236323</b> | –               | <b>JX236469</b> | –               |
|                                      | unknown                 |                  | <b>JX236396</b> | EU680666 | –               | –               | EU680603        | –               | AY319991        |
| <i>Orthotomus sutorius</i>           | Thailand                |                  | DQ008491        | –        | HQ333109        | –               | DQ008542        | HQ333092        | –               |
|                                      | India, Himachal Pradesh |                  | –               | –        | –               | HQ333061        | –               | –               | –               |
|                                      | unknown                 |                  | –               | GQ242050 | –               | –               | –               | –               | AY319992        |
| <i>Oxylabes madagascariensis</i>     | Madagascar              | FMNH:438719      | HQ706179        | –        | HQ706266        | HQ706188        | HQ706228        | HQ706306        | <b>JX236444</b> |
| <i>Panurus biarmicus</i>             | Sweden                  |                  | –               | EU680668 | FJ357919        | –               | FJ357983        | FJ358083        | FJ358150        |
|                                      | Austria                 | VH:A0855 (B0629) | <b>JX236397</b> | –        | –               | <b>JX236324</b> | –               | –               | –               |
| <i>Pellorneum capistratum</i>        | West Sumatra            | VH:A0910 (B0915) | <b>JX236398</b> | –        | –               | <b>JX236326</b> | <b>JX236361</b> | –               | <b>JX236445</b> |
|                                      |                         |                  | –               | –        | –               | –               | –               | –               | –               |
| <i>Phyllanthus atripennis</i>        | Ivory Coast             | VH:A1588 (B0883) | <b>JX236399</b> | –        | –               | <b>JX236327</b> | <b>JX236362</b> | –               | <b>JX236446</b> |
|                                      | Congo                   |                  | –               | –        | FJ357888        | –               | –               | FJ358057        | –               |
| <i>Phyllastrephus cerviniventris</i> | Malawi                  | VH:A1600 (B0891) | <b>JX236400</b> | EF626726 | –               | <b>JX236328</b> | <b>JX236363</b> | EF625315        | <b>JX236447</b> |
| <i>Phylloscopus collybita</i>        | unknown                 |                  | Z73487          | GQ242051 | –               | –               | –               | –               | –               |
|                                      | Sweden                  |                  | –               | –        | FJ357920        | –               | DQ125966        | FJ358084        | AY319997        |
| <i>Phylloscopus sindianus</i>        | Caucasus                | VH:B0216         | Z73478          | –        | –               | HQ706224        | –               | –               | <b>JX236448</b> |
|                                      | Turkey                  |                  | –               | –        | –               | –               | HQ706261        | HQ706340        | –               |
|                                      | Pakistan                |                  | –               | –        | HQ706302        | –               | –               | –               | –               |
| <i>Pnoepyga albiventer</i>           | China, Sichuan          |                  | HQ121521        | –        | FJ357889        | –               | FJ357959        | FJ358058        | FJ358124        |
| <i>Pnoepyga pusilla</i>              | China, Yunnan           |                  | –               | –        | FJ357890        | –               | FJ357960        | FJ358059        | FJ358125        |
|                                      | Sumatra                 | DZUG:3248        | <b>JX236401</b> | –        | –               | –               | –               | –               | –               |
| <i>Prinia bairdii</i>                | Cameroon                |                  | –               | –        | FJ357921        | –               | –               | –               | FJ358151        |
|                                      | unknown                 |                  | AY352536        | EU680675 | –               | –               | –               | –               | –               |
|                                      | Tanzania                | DZUG:475         | –               | –        | –               | –               | <b>JX236364</b> | <b>JX236470</b> | –               |
| <i>Prinia familiaris</i>             | Indonesia, Java         |                  | DQ008490        | –        | HQ121547        | HQ333063        | DQ008541        | HQ121557        | –               |
| <i>Prinia gracilis</i>               | India, Punjab           | DZUG:461         | <b>JX236402</b> | –        | –               | –               | –               | <b>JX236471</b> | –               |
|                                      | Israel                  | VH:A0734 (B0632) | –               | –        | –               | <b>JX236329</b> | <b>JX236365</b> | –               | <b>JX236449</b> |
| <i>Psaltriparus minimus</i>          | USA, Arizona            |                  | GU244418        | –        | –               | –               | –               | –               | –               |
|                                      | unknown                 |                  | –               | EU680678 | –               | –               | EU680582        | EU680757        | AY319999        |

## GenBank No.

|                                  |                         |                    |                 |          |                 |                 |                 |                 |                 |
|----------------------------------|-------------------------|--------------------|-----------------|----------|-----------------|-----------------|-----------------|-----------------|-----------------|
| <i>Pseudoalcippe abyssinica</i>  | Kenya                   | VH:B0863           | AJ534548        | –        | –               | <b>JX236330</b> | <b>JX236366</b> | –               | <b>JX236450</b> |
|                                  | unknown                 |                    | –               | EU680679 | –               | –               | –               | EU680758        | –               |
| <i>Pycnonotus barbatus</i>       | Mauretania              |                    | HQ333043        | –        | HQ333110        | HQ333062        | HQ333075        | HQ333093        | –               |
|                                  | Cameroon                |                    | –               | –        | –               | –               | –               | –               | FJ358152        |
|                                  | Kenya                   |                    | –               | EF626746 | –               | –               | –               | –               | –               |
| <i>Scotocerca inquieta</i>       | Tunisia                 |                    | HQ333044        | –        | HQ333111        | HQ333064        | HQ333076        | HQ333094        | –               |
| <i>Seicercus tephrocephalus</i>  | Myanmar                 |                    | HQ706182        | –        | HQ706301        | HQ706223        | HQ706260        | HQ706339        | –               |
| <i>Sinosuthora webbiana</i>      | China, Yunnan           | VH:A0880 (B0619)   | <b>JX236403</b> | –        | –               | <b>JX236333</b> | <b>JX236367</b> | –               | <b>JX236452</b> |
|                                  | unknown                 |                    | –               | EU680669 | –               | –               | –               | EU680748        | –               |
| <i>Sphenoeacus afer</i>          | South Africa            | VH:B0898           | <b>JX236404</b> | –        | –               | HQ333066        | <b>JX236368</b> | –               | –               |
|                                  | unknown                 |                    | –               | EU680687 | –               | –               | –               | EU680766        | AY799822        |
| <i>Spiloptila clamans</i>        | Mauretania              | VH:A1598 (B0887)   | DQ008495        | –        | –               | <b>JX236335</b> | DQ008546        | –               | <b>JX236453</b> |
|                                  | Mauretania              | DZUG:3247          | –               | –        | –               | –               | –               | <b>JX236472</b> | –               |
| <i>Stachyris nigriceps</i>       | Vietnam                 |                    | HQ333045        | EU680688 | –               | HQ333065        | –               | HQ333095        | –               |
|                                  | Thailand                |                    | –               | –        | FJ357900        | –               | FJ357969        | –               | FJ358135        |
| <i>Sylvia atricapilla</i>        | Germany                 |                    | Z73494          | EU680691 | –               | HQ333067        | AY887727        | –               | –               |
|                                  | Sweden                  |                    | –               | –        | EF441232        | –               | –               | EF441254        | EF568261        |
| <i>Sylvietta brachyura</i>       | Senegal                 | VH:B0902           | <b>JX236406</b> | –        | –               | <b>JX236338</b> | –               | –               | <b>JX236454</b> |
|                                  | Cameroon                |                    | –               | –        | –               | –               | DQ125960        | –               | –               |
| <i>Sylvietta whytii</i>          | Tanzania                |                    | DQ008501        | EU680693 | HQ121548        | –               | DQ008552        | EU680772        | –               |
| <i>Tesia castaneocoronata</i>    | India, Himachal Pradesh | VH:A0860 (B0683)   | JN808933        | –        | <b>JX236294</b> | –               | JN809081        | JN809044        | <b>JX236455</b> |
|                                  |                         |                    | –               | –        | –               | –               | –               | –               | –               |
| <i>Thamnornis chloropetoides</i> | Madagascar              |                    | HQ333046        | EU680694 | FJ357923        | HQ333068        | HQ333077        | HQ333096        | AY320004        |
| <i>Trochalopteron elliotii</i>   | China, Sichuan          | ZMUC:121571(O5782) | <b>JX236407</b> | –        | –               | <b>JX236339</b> | <b>JX236369</b> | –               | <b>JX236456</b> |
|                                  |                         |                    | –               | –        | –               | –               | –               | –               | –               |
| <i>Turdoides squamiceps</i>      | Israel                  | VH:A1578 (B0906)   | <b>JX236409</b> | –        | <b>JX236292</b> | <b>JX236341</b> | <b>JX236370</b> | –               | <b>JX236458</b> |
|                                  |                         |                    | –               | –        | –               | –               | –               | –               | –               |
| <i>Xanthomixis apperti</i>       | Madagascar              | FMNH:427370        | HQ706181        | –        | HQ706265        | HQ706187        | HQ706227        | HQ706305        | <b>JX236459</b> |
| <i>Yuhina flavicollis</i>        | unknown                 | VH:A1634 (B0843)   | <b>JX236410</b> | –        | –               | <b>JX236342</b> | –               | –               | –               |
|                                  | Vietnam                 |                    | –               | –        | FJ357908        | –               | FJ357977        | FJ358077        | FJ358143        |
| <i>Zosterops japonicus</i>       | China, Yunnan           |                    | –               | –        | FJ357910        | –               | FJ357979        | FJ358079        | FJ358145        |
|                                  | Korea                   |                    | AB159168        | –        | –               | –               | –               | –               | –               |
| <b>Outgroup</b>                  |                         |                    |                 |          |                 |                 |                 |                 |                 |
| <i>Catharus guttatus</i>         | USA,                    |                    | EU619718        | EU680632 | –               | –               | DQ466820        | EU680712        | AY307184        |
| <i>Certhia familiaris</i>        | Sweden, Uppland         |                    | –               | EU680633 | –               | –               | DQ011861        | EU680713        | –               |
|                                  | unknown                 |                    | –               | –        | –               | –               | –               | –               | AY056983        |
|                                  | Austria                 | VH:B0601           | <b>JX236379</b> | –        | –               | <b>JX236303</b> | –               | –               | –               |
| <i>Chaetops frenatus</i>         | South Africa            |                    | –               | –        | –               | <b>JX236304</b> | –               | –               | –               |

## GenBank No.

|                                |                           |                  |                 |          |                 |                 |                 |                 |                 |
|--------------------------------|---------------------------|------------------|-----------------|----------|-----------------|-----------------|-----------------|-----------------|-----------------|
|                                | unknown                   |                  | AY228052        | EU680635 | EF441212        | –               | AY228289        | EU680715        | AY443266        |
| <i>Corvus corone</i>           | France                    |                  | U86032          | AY529982 | FJ357914        | –               | FJ357980        | –               | –               |
|                                | unknown                   |                  | –               | –        | –               | –               | –               | EU272116        | AY056989        |
| <i>Culicicapa ceylonensis</i>  | Vietnam, Kon Tum Province | NRM:20036793     | AF096453        | EU680640 | GQ369627        | <b>JX236308</b> | EU680605        | EU680720        | AY443279        |
| <i>Erpornis zantholeuca</i>    | unknown                   | VH:A0907 (B0845) | <b>JX236386</b> | –        | –               | <b>JX236312</b> | <b>JX236354</b> | –               | AY443339        |
| <i>Leucosticte nemoricola</i>  | Nepal                     | VH:A1651 (B0889) | <b>JX236392</b> | –        | –               | <b>JX236317</b> | <b>JX236358</b> | –               | –               |
|                                | Nepal                     | VH:A1652 (B0888) | –               | –        | –               | –               | –               | –               | <b>JX236436</b> |
|                                | Pakistan                  | DZUG:1552        | –               | –        | –               | –               | –               | <b>JX236466</b> | –               |
| <i>Montifringilla nivalis</i>  | Mongolia                  | VH:A1644 (B0873) | –               | –        | –               | –               | –               | –               | <b>JX236442</b> |
|                                | Mongolia                  | VH:A1645 (B0874) | <b>JX236394</b> | –        | –               | <b>JX236321</b> | –               | –               | –               |
|                                | Russia                    | UWBM:75748       | –               | –        | –               | –               | –               | <b>JX236467</b> | –               |
|                                | Germany                   |                  | –               | –        | –               | –               | DQ244066        | –               | –               |
| <i>Mystacornis crossleyia</i>  | Madagascar                | FMNH:345863      | <b>JX236395</b> | FJ178360 | <b>JX236291</b> | <b>JX236322</b> | <b>JX236360</b> | <b>JX236468</b> | <b>JX236443</b> |
| <i>Parus major</i>             | unknown                   |                  | EU167009        | EU680670 | –               | –               | –               | EU680749        | AY443314        |
|                                | Sweden, Uppland           |                  | –               | –        | EU272098        | <b>JX236325</b> | AY228310        | –               | –               |
| <i>Passer montanus</i>         | Sweden                    |                  | –               | EF626752 | AY336586        | –               | AY228311        | EU325847        | –               |
|                                | Pakistan                  |                  | AY030118        | –        | –               | –               | –               | –               | –               |
|                                | unknown                   |                  | –               | –        | –               | –               | –               | –               | AF143738        |
| <i>Regulus regulus</i>         | Austria                   | VH:B0899         | –               | –        | –               | <b>JX236331</b> | –               | –               | <b>JX236451</b> |
|                                | unknown                   |                  | AJ004762        | –        | –               | –               | –               | –               | –               |
|                                | Sweden, Uppland           |                  | –               | EU680682 | –               | –               | DQ008572        | EU680761        | –               |
| <i>Remiz pendulinus</i>        | Sweden                    |                  | AY228081        | EU680683 | –               | <b>JX236332</b> | AY228319        | EU680762        | AY443328        |
| <i>Sitta europea</i>           | Sweden                    |                  | AF378102        | EU680686 | –               | <b>JX236334</b> | AY064257        | EU680765        | AY064272        |
| <i>Stenostira scita</i>        | South Africa              |                  | <b>JX236405</b> | EU680689 | GQ369629        | <b>JX236336</b> | EU680607        | EU680768        | –               |
|                                | unknown                   |                  | –               | –        | –               | –               | –               | –               | AY799823        |
| <i>Sturnus vulgaris</i>        | Sweden                    |                  | HM633385        | EU680690 | –               | <b>JX236337</b> | AY228322        | EU680769        | DQ466812        |
| <i>Troglodytes troglodytes</i> | Austria                   | VH:B0900         | <b>JX236408</b> | –        | –               | <b>JX236340</b> | –               | –               | <b>JX236457</b> |
|                                | Sweden                    |                  | –               | EU680696 | –               | –               | AY228325        | EU680775        | –               |
